# Supplementary material for: Improve Dentin Bonding Performance Using a Hydrolytically Stable, Ether-Based Primer
Source: MDPI journal article supplement (doi:10.3390/jfb13030128), 2022-08-26
Supplement: s1 [file s1]

# **Improve Dentin Bonding Performance Using a Hydrolytically Stable, Ether-Based Primer**

**Xiaohong Wang<sup>1,\*</sup> and Shinobu Yamauchi<sup>1,2</sup>**

<sup>1</sup> American Dental Association Science & Research Institute, Gaithersburg, MD 20899, USA

<sup>2</sup> Research Center for Electron Photon Science, Tohoku University, Sendai, Miyagi 982-0826, Japan

\* Correspondence: wangx@ada.org

## **Contents:**

Table S1. Summary of resin compositions and their functions in dental restorations

Figure S1. Illustration of bonding procedures

Figure S2: Illustration of procedures for shear bond strength (SBS) evaluation

Figure S3: Illustration of procedures for micro-tensile bond strength ( $\mu$ TBS) evaluation and thermal cycling (TC)

Figure S4: Microtensile bond strength ( $\mu$ TBS) values of five testing groups

Figure S5. Representative fractured SBS specimens under optical microscopy

Figure S6. Representative fractured  $\mu$ TBS specimens under scanning electron microscopy.

**Table S1. Summary of resin compositions and their functions in dental restorations\***

| Acronym        | Composition                                                                   | Detail composition                                                                                          | Primer | Adhesive | Composite |
|----------------|-------------------------------------------------------------------------------|-------------------------------------------------------------------------------------------------------------|--------|----------|-----------|
| NTG-GMA        | NTG-GMA<br><br>PMGDM+<br>HEMA                                                 | 5% NTG-GMA<br>acetone solution<br><br>20%<br>PMGDM+<br>HEMA<br>1:1<br>CQ/4EDM<br>AB<br>acetone<br>solution  | Y      |          |           |
| NTG-VBGE       | NTG-VBGE<br><br>PMGDM+<br>HEMA                                                | 5% NTG-VBGE<br>acetone solution<br><br>20%<br>PMGDM+<br>HEMA<br>1:1<br>CQ/4EDM<br>AB<br>acetone<br>solution | Y      |          |           |
| B/H            | BisGMA/<br>HEMA                                                               | BisGMA/<br>HEMA<br>60/40 by<br>weight,<br>CQ/4EDM<br>AB                                                     |        | Y        |           |
| U/V            | UDMA/T<br>EG-DVBE                                                             | UDMA/T<br>EG-DVBE<br>(1:1 mole),<br>CQ/4EDM<br>AB                                                           |        | Y        |           |
| Z250           | Filtek™ Z250 Universal<br>Restorative (3M ESPE, St. Paul,<br>MN, USA)         |                                                                                                             |        |          | Y         |
| Scotch<br>bond | Adper™ Scotchbond™ Multi-<br>Purpose Adhesive (3M ESPE,<br>St. Paul, MN, USA) |                                                                                                             | Y      | Y        |           |

\*Note: Y indicates that the corresponding resin is used in a primer, adhesive, or composite. Abbreviations of chemicals in the table: 2-bis(4-(2-hydroxy-3-methacryl-oxypropoxy)-phenyl)-propane) (Bis-GMA), urethane dimethacrylate (UDMA), 2-hydroxyethyl-methacrylate (HEMA), pyromellitic glycerol dimethacrylate (PMGDM), triethylene glycol divinylbenzyl ether (TEG-DVBE), glycine, N-(2-hydroxy-3-(2-methyl-1-oxo-2-propenyl)propyl)-N-(4-methylphenyl), monosodium salt (NTG-GMA), glycine, N-2-hydroxy-3-(4-vinylbenzyloxy)-propyl-N-(4-methylphenyl), monosodium salt (NTG-VBGE), camphorquinone (CQ), ethyl 4-N, N-dimethylaminobenzoate (4EDMAB).

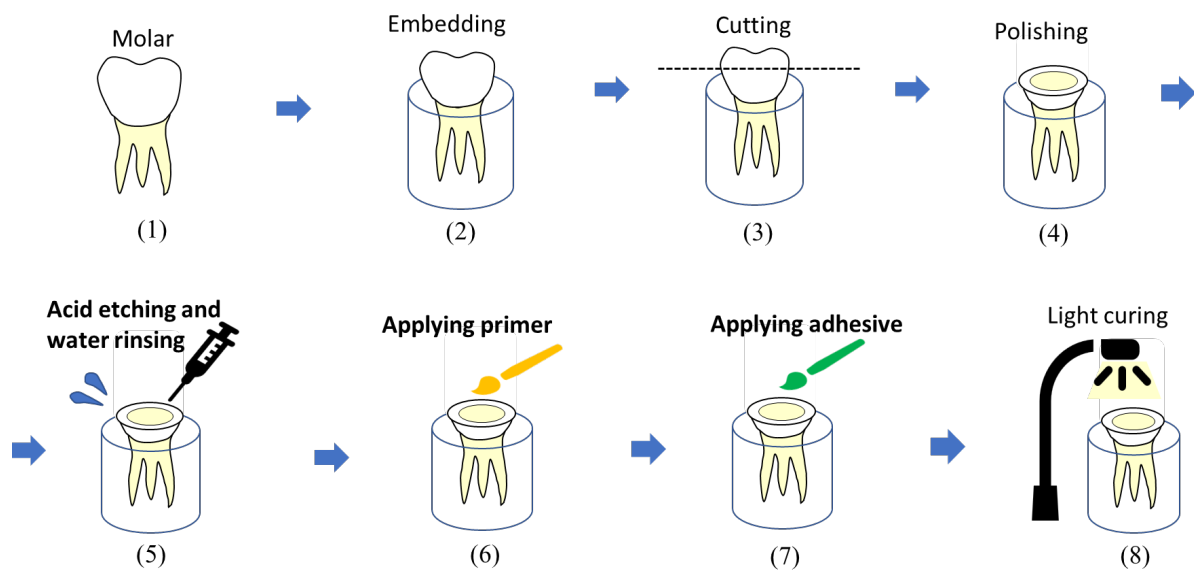

Figure S1. Illustration of procedures of tooth embedding and 3-step bonding procedures. We use the classical 3-step bonding procedure. After a molar (1) was embedded (2), the enamel part was cut (3) and polished (4), the dentin surface was acid-etched (5), apply with primer (6), and adhesive (7), then light-cured (8).

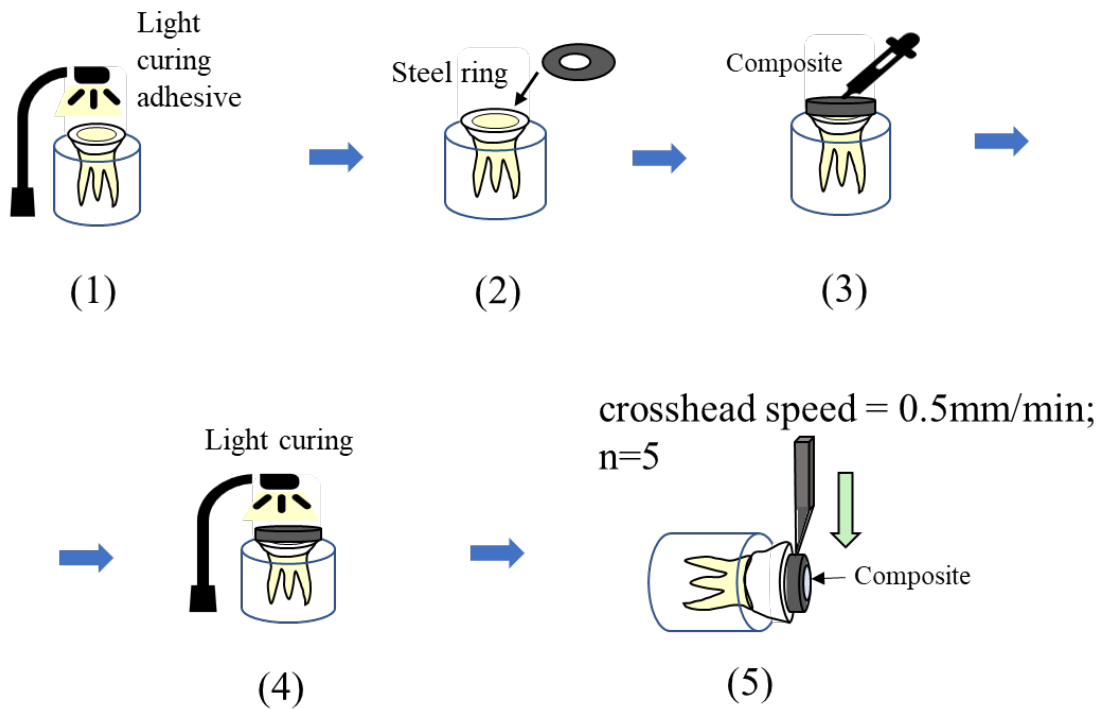

Figure S2. Illustration of procedures for shear bond strength evaluation. After curing adhesive (1), a metal ring was applied on top of the dentin (2), and the composite was applied within the ring (3). After curing composites (4), the sample was broken by a shear force for SBS evaluation (5).

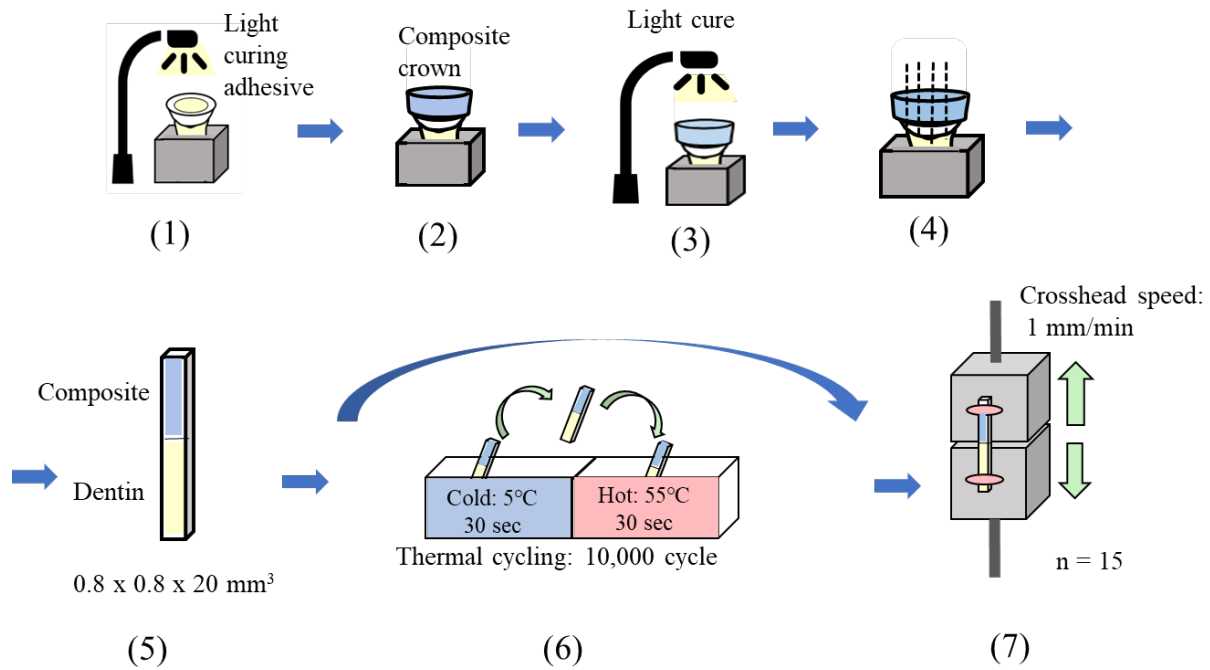

Figure S3. Illustration of procedures for micro-tensile bond strength ( $\mu$ TBS) evaluation and thermal cycling (TC). After curing adhesive (1), a composite crown was built (2) and cured (3). Then the embedded tooth was sliced (4) into beams (5). The beams were undergoing 0 or 10,000 cycles of thermal cycling (6) before  $\mu$ TBS tests (7).

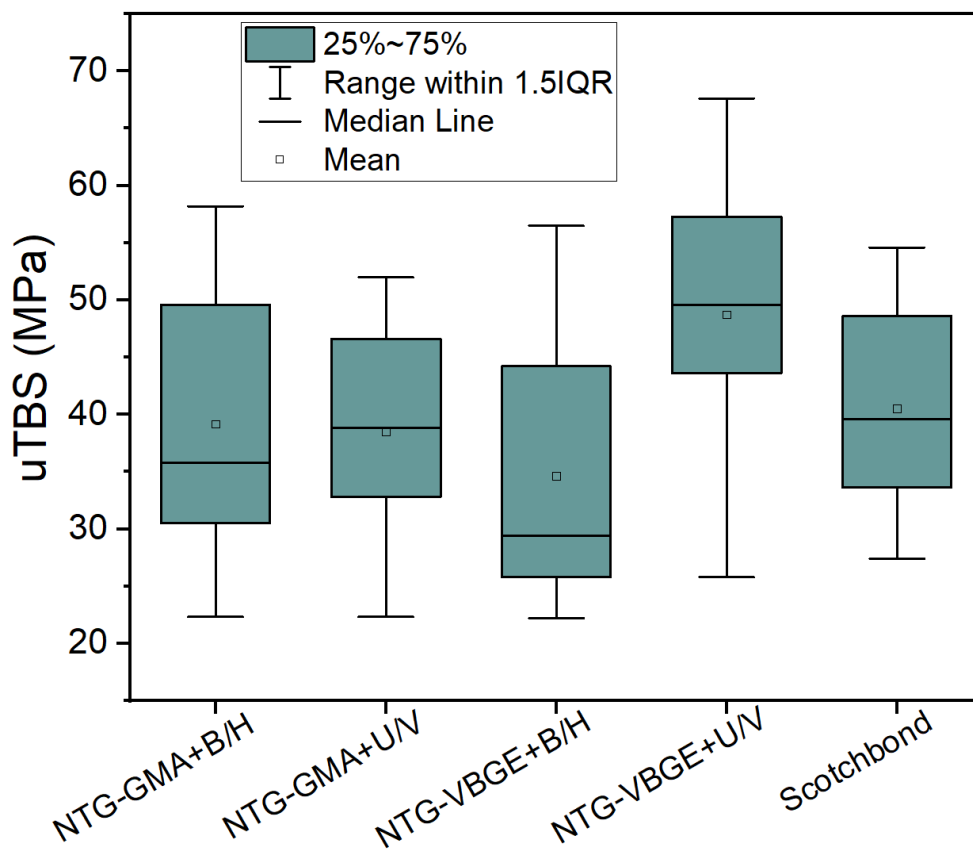

Figure S4. Microtensile bond strength ( $\mu$ TBS) values of five testing groups before thermal cycling. There is no outlier in the box plot.

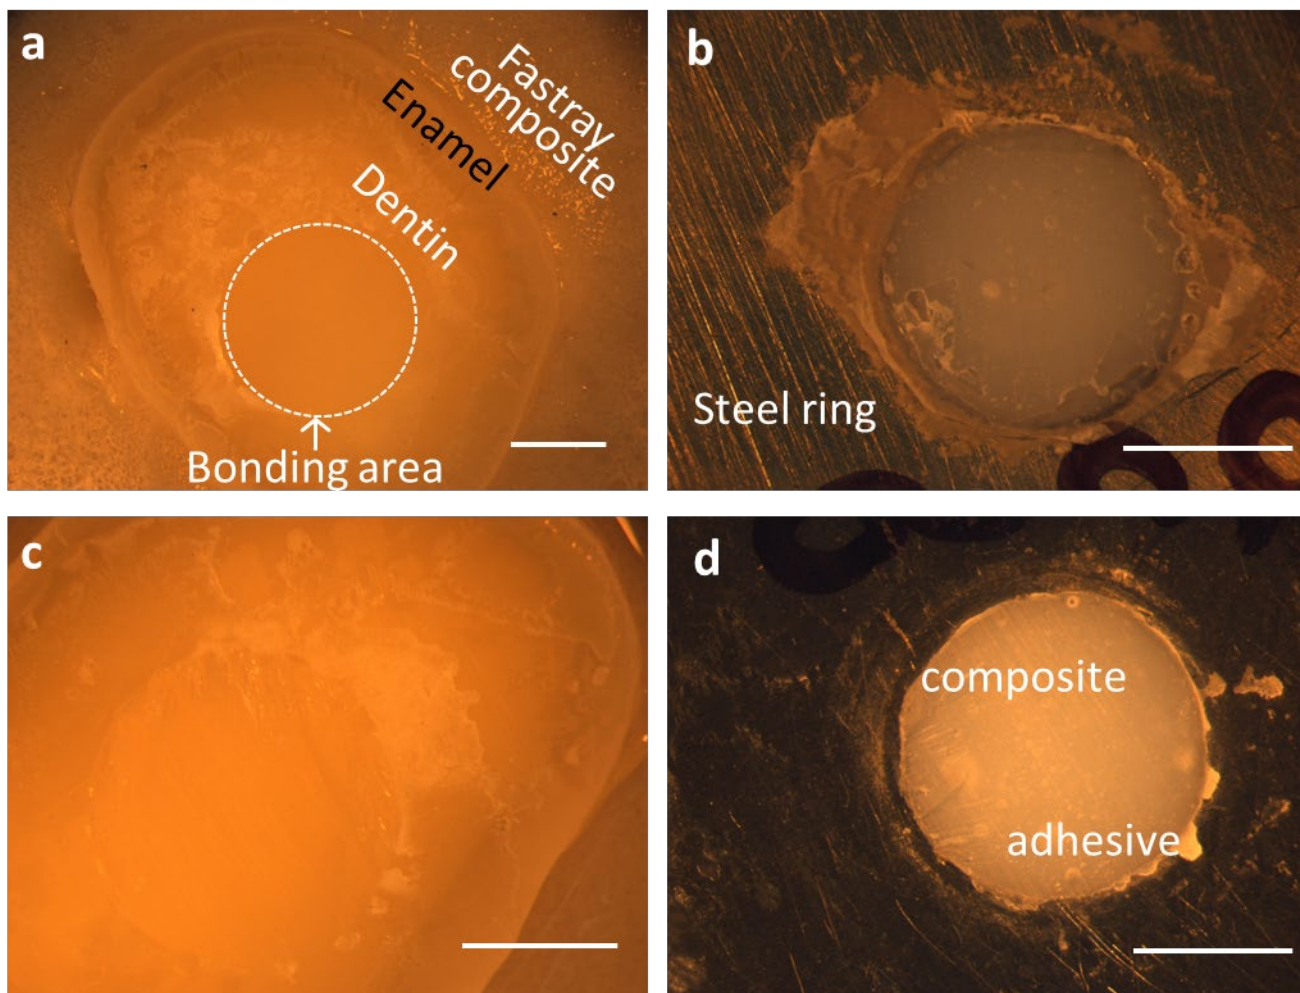

Figure S5. Representative fractured SBS specimens under optical microscopy: interfaces at the tooth side (a & c) and the composite side (b & d). Scale bars: 2 mm.

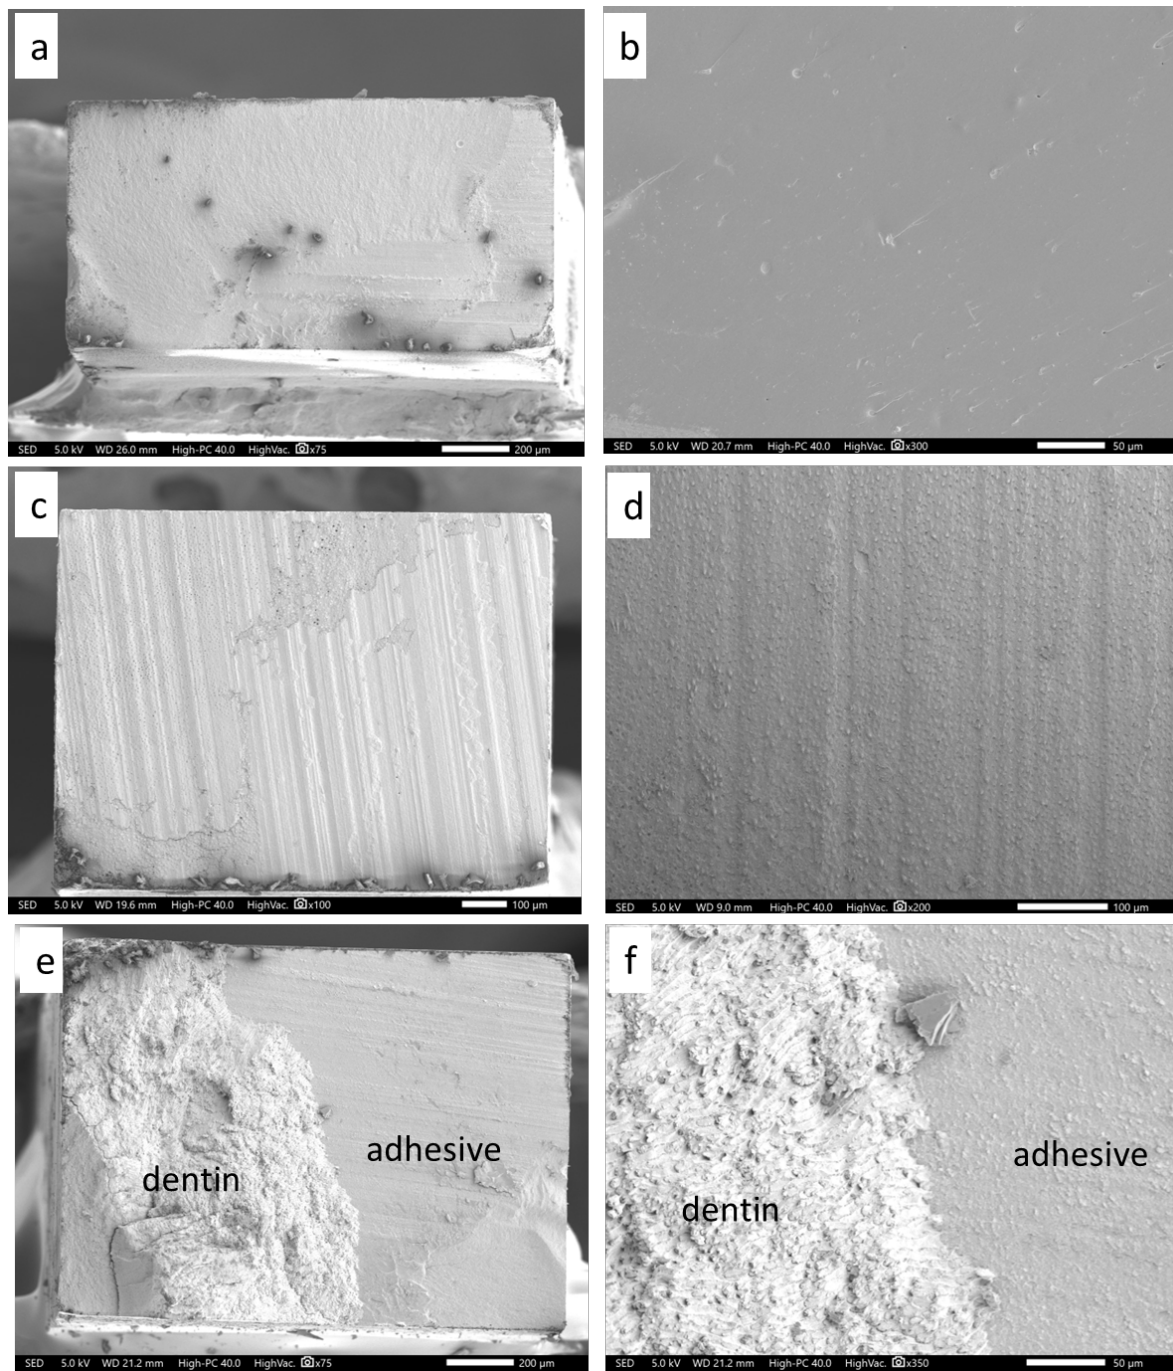

Figure S6. Representative fractured  $\mu$ TBS specimens under scanning electron microscopy. (a) & (b): cohesive failure in the adhesive layer; (c) & (d): adhesive failure along the dentin surface; (e) & (f): mixed failure.
